# Supplementary material for: A Systematic Review on Commercially Available and Validated Sensor Technologies for Welfare Assessment of Dairy Cattle
Source: Front Vet Sci. 2021 Mar 29;8:634338. doi: 10.3389/fvets.2021.634338 (PMC8044875; doi:10.3389/fvets.2021.634338)
Supplement: Supplementary file 1 [file Data_Sheet_1.xlsx]

## Sheet: Appendix table 1
NAME	PROVIDER	INTERNET LINK	SENSOR TYPE	AIM	COUNTRY	Validation studies
WellCow Bolus	4i	https://www.i4pd.co.uk/work/well-cow-bolus-ph-and-temperature-monitor/	Bolus	Rumen acidosis monitoring	UK
AfiAct II	Afimilk	https://www.afimilk.com/cow-monitoring	Accelerometer (leg)	Monitoring activity feeding, rumination, lying behaviour, heat detection, rest, health and wellbing	Israel	yes
AfiCollar	Afimilk	https://www.afimilk.com/cow-monitoring	Accelerometer (Collar)	Heat detection, rumination, health alerts	Israel
AfiLab	Afimilk	https://www.afimilk.com/parlor-automation	Milk quality sensors (Spectrometer)	Milk composition analysis, monitoring general health and udder health	Israel	yes
AfiMilk MPC	Afimilk	https://www.afimilk.com/parlor-automation	Milk quality sensors (Spectrometer)	Ketosis and SARA detection	Israel
eSheperd	Agersens	https://www.agersens.com/	GPS (Collar)	Virtual fence	Australia
Agricam CaDDi Mastitis	Agricam	https://www.agricam.se/sensorer?lang=en	Camera (thermal)	Monitoring udder health	Sweden
Cattle bolus	Agrismart	https://www.agrismart.co.uk/farming-solutions/bolus/	Bolus	Measures rumen temperature	UK
SenseHub Dairy	Allflex	https://www.allflex.global/product/sensehub-dairy/	Accelerometer (Collar/ear)	reproductive, health, nutritional and wellbeing status of individual cows and groups	UK
Heatime HR LD (Hi-Tag)	Allflex	https://www.scrdairy.com/cow-intelligence/heatime-hr-system.html	Accelerometer (ear) / microphone	Monitoring activity for heat detection and health, rumination and feeding times	UK	yes
Heatime Pro+	Allflex	http://www.scrdairy.com/herd-intelligence/scr-heatime-hr-system.html	Accelerometer (Collar/ear)	Monitoring activity for heat detection and health, rumination and feeding times	UK
Cattle feed station	ATL	https://www.atlagri.com/about-us-2018/	Load cells/RFID	Feeding monitoring - feed concentrates	UK
Cowdition	Bayer	https://play.google.com/store/apps/details?id=com.bayer.bcscowdition&hl=en	Mobile app	scoring of dairy cows’ body condition	Germany
CRFI	BioControl	http://www.biocontrol.no/products/controlling-and-recording-feed-intake/	Load cells/RFID	Individual feed intake monitoring	Norway
Biotic ID-TEK	Biotic Industries	https://biotic.com/calves/	Load cells/RFID	manages and track the feeding program of each animal. Fresh and replacement milk	USA
Real Time + RL	Boumatic	https://boumatic.com/us_es/productos/heatseeker-cow-monitoring-systems-us	Accelerometer (Collar)	Monitoring activity for heat detection and health, rumination and feeding times, location indoor	USA
StepMatrix	Boumatic	https://kruegersboumatic.com/automation/stepmetrix/	Load cells	Analyzes gat pressure to detect limp, for lameness diagnosis	USA	yes
Calf feeding system	Boumatic	http://www.electromechagri.com/parlour-feeding-solutions/boumatic-calf-feeding-system/	Load cells/RFID	manages and track the feeding program of each animal. Fresh and replacement milk	USA
Gemini- single box	Boumatic	https://boumatic.com/us_en/products/gemini-miking-robot-1-2	Milking robot (box)	monitor and analyse the milk production performance	USA
Gemini- double box	Boumatic	https://boumatic.com/us_en/products/gemini-the-boumatic-milking-robot-1-1-1	Milking robot (box)	monitor and analyse the milk production performance	USA
Alus Nutrition	Cainthus	https://www.cainthus.com/alus	Camera	Monitors events like feed deliveries, push-ups & clean-outs (the farmer schedules it). Tracks accessibility of feed 24/7 and will highlight times when feed is inaccessible, allowing the farmer to adjust the feed management plan if necessary.	Ireland
Cattlewatch	Cattlewatch	http://www.cattle-watch.com/	Accelerometer (Collar) / GPS	Monitoring activity for heat detection, health and feeding. Outdoor positioning. Herds counting, theft alerts	Israel
Ceres Tag	Ceres Tag	https://www.cerestag.com/benefits/	Accelerometer (ear) /GPS/ body-temperature sensor	Monitoring activity, body temperature, positioning, feeding behaviour, health and welfare monitoring	Australia
Ida	Connecterra	https://ida.io/ida-for-farmers/	Accelerometer (Collar)	Monitoring activity for heat detection and health, rumination and feeding times	Netherlands
Cow Manager	CowManager	https://www.cowmanager.com/en-us/	Accelerometer (ear) / body-temperature sensor	Feeding (rumination) and activity behaviours - lying, heat detection, location monitor, health alerts	Netherlands	yes
Ovalert Neck	CRV	https://www.crv4all-international.com/service/ovalert/	Accelerometer (Collar)	Monitoring activity for heat detection and health	Netherlands
Ovalert Leg	CRV	https://www.crv4all-international.com/service/ovalert/	Accelerometer (leg)	Monitoring activity for heat detection and health	Netherlands
MooMonitor +	Dairy master	https://www.dairymaster.com/products/moomonitor/	Accelerometer (Collar)	Monitoring activity for heat detection and health, rumination (grazing behaviour) and feeding times, measuring resting time	USA	yes
Activity Meter System	DeLaval	http://dairycare.co.za/product/activity-meter-system/	Accelerometer (Collar)	Monitoring activity for heat detection, health status	Sweden
DeLaval BCS	DeLaval	http://www.delavalcorporate.com/our-products-and-services/farm-support/delaval-body-condition-scoring-bcs/	Camera (3D)	Automatic body condition scoring	Sweden	yes
DeLaval DCC	DeLaval	https://www.delaval.com/en-ie/our-solutions/milking/udder-health--hygiene/milk-testing/delaval-cell-counter-dcc/#:~:text=Precise%20and%20fast%20somatic%20cell%20count%20measurement&text=DeLaval%20cell%20counter%20DCC%20counts,act%20as%20fast%20as%20possible.	Milk quality sensors ( Camera for cytometry)	Udder health monitoring	Sweden
DeLaval OCC	DeLaval	https://www.delaval.com/en-nz/our-solutions/milking/udder-health--hygiene/milk-testing/delaval-online-cell-counter-occ/	Milk quality sensors ( Camera for cytometry)	Udder health monitoring (integrated to VMS DeLaval Milking robot)	Sweden
Feed Station FSC400™	Delaval	https://www.delaval.com/en-ie/our-solutions/feeding/feed-stations/delaval-feed-stations-fsc40-and-fsc400/	Load cells/RFID	Measures individual feed intake (concentrate)	Sweden
CF150X	DeLaval	http://www3.delaval.com/ImageVaultFiles/id_198/cf_5/DeLaval_calf_feeders.PDF	Load cells/RFID	manages and track the feeding program of each animal. Fresh and replacement milk	Sweden
CF500+	DeLaval	http://www3.delaval.com/ImageVaultFiles/id_198/cf_5/DeLaval_calf_feeders.PDF	Load cells/RFID	manages and track the feeding program of each animal. Replacement milk (optional fresh milk)	Sweden
CF1000+	DeLaval	http://www3.delaval.com/ImageVaultFiles/id_198/cf_5/DeLaval_calf_feeders.PDF	Load cells/RFID	manages and track the feeding program of each animal. Replacement milk (optional fresh milk)	Sweden
DeLaval AMR™	DeLaval	http://www.delavalcorporate.com/our-products-and-services/milking/automatic-milking/	Milking robot (rotary)	monitor and analyse the milk production performance	Sweden
DeLaval VMS™	DeLaval	http://www.delavalcorporate.com/our-products-and-services/milking/automatic-milking/#/-/Product-Information1/Milking/Systems/Automatic/	Milking robot (box)	monitor and analyse the milk production performance	Sweden
Herd Navigator	DeLaval	https://www.delaval.com/en-ie/our-solutions/farm-management/delpro-precision-analytics/herd-navigator/	Milk quality sensors (Spectrometer/biochemical test)	Analysis of individual progesterone, LDH and BHB leves in milk for health and heat meassurement, every milking	Sweden
Digitanimal GPS tracker	Digitanimal	https://digitanimal.com/?lang=en	GPS (Collar)	Positioning tracking. Optional activity and body temperature meassurements.	Spain
HDX RFID	Doowa	https://www.doowa-rfid.com/ruminal-bolus/hdx-rfid-rumen-bolus-67-5g	Bolus	Electronic ID	China
eBolus	eCow UK	https://ecow.co.uk/	Bolus	Measures activity, pH, and temperature in rumen	UK	yes
FirstLook Mastitis system	EIO Diagnostics’	https://eiodiagnostics.com/technology/	Camera (thermal)	Mastitis identification	Canada
Smart Paddock Feeder	Eli	https://www.eli-innovation.com.au/smart-paddock-feeder.html	Load cells/RFID	Individual automatic feeding	Australia
Track a))) Cow	ENGS, Rosh Pina, Israel	http://www.engs-dairy.com/	Accelerometer (Collar/leg)	Activity monitoring, heat detection, health and welfare monitoring, calving monitoring	Israel	yes
Galaxy	Farmtec	https://www.farmtec.cz/en/milking-robot-galaxy-519.html	Milking robot (box)	monitor and analyse the milk production performance	Czech Republic
IceTag	FCCx IceRobotics	https://www.icerobotics.com/wp-content/uploads/2019/07/Lameness-Detection_June19.pdf	Accelerometer (leg)	Monitoring activity (lying, walking), Early detection and warning of lameness, pastur activity - nr of steps, health alerts	UK	yes
IceQube, cowAlert	FCCx IceRobotics	https://www.icerobotics.com/wp-content/uploads/2019/07/Lameness-Detection_June19.pdf	Accelerometer (leg)	Monitoring activity (lying, walking, rumination), Early detection and warning of lameness, health alerts	UK	yes
Felixcan EI9024	Felixcan	http://www.felixcan.com/eng/Ruminal_Bolus.html	Bolus	Electronic ID	Spain
FLIR AX8	Flir	https://www.flir.com/products/ax8-automation/	Camera (thermal)	Thermal imaging to detect inflammation, fever… Udder health or lamenesse	USA
Flir T300 / FLIR 760 IR scanner / IRI 4010 / ThermaCam545 / ThermaCam P25 / FLIR Inframetrics 760	Flir	https://www.flir.eu/	Camera (thermal)	Thermal imaging to detect inflammation, fever… Udder health or lamenesse	USA
IR FlexCam Pro	Fluke	https://www.fluke.com/en/product/thermal-cameras/ti45ft	Camera (thermal)	Thermal imaging to detect inflammation, fever… Udder health or lamenesse	USA
ET912 Fofia	Fofia	http://www.fofia.com/	Bolus	Measures rumen pH	China
Pellegro Livestock	Followit	https://www.followit.se/livestock/index.html	Accelerometer (Collar) / GPS	Monitoring activity for heat detection, health and feeding. Outdoor positioning. Herds counting, theft alerts	Sweden
Tellus Livestock	Followit	https://www.followit.se/livestock/index.html	Accelerometer (Collar) / GPS	Monitoring activity for heat detection, health and feeding. Outdoor positioning. Herds counting, theft alerts	Sweden
Compact Smart	Förster Technik	https://www.foerster-technik.com/	Load cells/RFID	manages and track the feeding program of each animal. Fresh and replacement milk	Germany
Vario Smart	Förster Technik	https://www.foerster-technik.com/	Load cells/RFID	manages and track the feeding program of each animal. Fresh and replacement milk	Germany
Smart-calf-system	Förster Technik	https://www.foerster-technik.com/smart-calf-system-en/	Load cells/RFID	Individual automatic feeding	Germany
Smart Neckband	Förster Technik	https://www.foerster-technik.com/smart-calf-system-en/	Accelerometer (Collar)	Monitoring activity, and identifying calves by LED, managed by cloud app, activity and health status for calves	Germany
Crystalab	Fullwood Packo	https://fullwoodpacko.com/products/cow-monitoring-and-herd-management/crysta-lab-milk-analyser/	Milk quality sensors (Spectrometer)	Analysis of milk composition, and presence of blood	UK
Vitality	Fullwood Packo	https://fullwoodpacko.com/	Accelerometer (leg)	Monitoring activity for heat detection and health	UK
M2erlin	Fullwood Packo	https://fullwoodpacko.com/products/robotic-milking/	Milking robot (box)	monitor and analyse the milk production performance	UK
CowView	Gea	http://www.gea-cowview.com/	Accelerometer (Collar)	Animal location for big herds gestion, Health and Fertility Management	Germany
Taxatron	Gea	https://www.gea.com/en/products/milking-farming-barn/dairybarn-farm-equipment/barn-handling-routing/cow-treatment/animal-scale-taxatron-5000.jsp	Load cells/RFID	Body weight in motion	Germany
CowScout S	Gea	https://www.accelgen.com/upload/product/files/english/0412gea-cow-scout-brochure-lr.pdf	Accelerometer (Collar/leg)	Monitoring activity (standing, walking, lying) for heat detection, and health	Germany	yes
DairyFeed J C400+	Gea	https://www.gea.com/en/products/calf-feeder-dairyfeed-j.jsp	Load cells/RFID	manages and track the feeding program of each animal. Fresh and replacement milk	Germany
DairyFeed V600+	Gea	https://www.gea.com/en/products/calf-feeder-dairyfeed-j.jsp	Load cells/RFID	manages and track the feeding program of each animal. Fresh and replacement milk	Germany
DairyFeed V640	Gea	https://www.gea.com/en/products/calf-feeder-dairyfeed-j.jsp	Load cells/RFID	manages and track the feeding program of each animal. Fresh and replacement milk	Germany
DairyFeed C 8000	Gea	https://www.gea.com/en/products/automatic-feeding-dairyfeed-c-8000.jsp	Load cells/RFID	Individual feed mixer intake based on requirements.	Germany
M6850	Gea	https://www.gea.com/en/products/dairymilk-m6850-cell-count-sensor.jsp	Milk quality sensors (Permittivity sensor)	SCC focussed on each udder quarter individually during the entire milking process	Germany
DairyRobot R9500	Gea	https://www.gea.com/en/products/milking-farming-barn/dairyrobot-automated-milking/dairyrobot-r9500-robotic-milking-system.jsp	Milking robot (box)	monitor and analyse the milk production performance	Germany
DairyProQ	Gea	https://www.gea.com/en/products/milking-farming-barn/dairyrobot-automated-milking/rotary-parlor-dairyproq.jsp	Milking robot (rotary)	monitor and analyse the milk production performance	Germany
GrowSafe feed alley	GrowSafe Systems Ltd	https://growsafe.com/our-platform/	Load cells/RFID	Feeding duration	Canada	yes
HerdInflight	HerdInsights	https://www.animalhealthmonitoring.com/	Accelerometer (Collar) / drone	Monitoring activity for heat detection, health and feeding behaviour	Ireland
HerdInsights	HerdInsights	https://www.animalhealthmonitoring.com/	Accelerometer (Collar)	Monitoring activity for heat detection, health and feeding behaviour	Ireland	yes
FEED CONCENTRATES EQUIPMENT	Hetwin	https://www.hetwin.at/en/hetwin-feed-concentrates-equipment.html	Load cells/RFID	Feeding monitoring - feed concentrates	Austria
RIC	Hokofarm Group	https://www.hokofarmgroup.com/ric/	Load cells/RFID	Measures individual feed and water intake.	Netherlands	yes
H&L 100	Holm & Laue	https://www.holm-laue.de/index.php/hl100?ln=en-GB#ad-image-0	Load cells/RFID	manages and track the feeding program of each animal. Fresh and replacement milk	Germany
Calf Star	Holm & Laue	https://store.calfstar.com/products/automatic-calf-feeders?_pos=7&_sid=10f9fd176&_ss=r	Load cells/RFID	manages and track the feeding program of each animal. Fresh and replacement milk	Germany
Calfexpert	Holm & Laue	https://www.holm-laue.de/index.php/calfguide	Load cells/RFID	manages and track the feeding program of each animal. Replacement milk	Germany
Hygiene-station	Holm & Laue	https://www.holm-laue.de/index.php/hygiene-station?ln=en-GB#ad-image-0	Load cells/RFID	manages and track the feeding program of each animal. Replacement milk	Germany
Calfguide software	Holm & Laue	https://www.holm-laue.de/index.php/calfguide	Load cells/RFID	Individual automatic feeding	Germany
RumiWatch	ITIN-HOCH	https://www.rumiwatch.ch/	Accelerometer (head, leg)/ Pressure sensors	Rumination monitoring, activity meter, health	Switzerland	yes
Evolution Automatic Calf Feeder	JFC Agri	http://jfcagri.com/cattle/evolution-calf-feeder/evo-s4/	Load cells/RFID	Manages and track the feeding program of each animal. Replacement milk	Ireland
Qwes HR-LD	Lely	https://www.lely.com/media/filer_public/77/81/7781ea55-1a10-4aa1-9a70-d80de1e28360/lely_dairy_equipment_en.pdf	Accelerometer (Collar) / microphone	Monitoring activity for heat detection and health, rumination and feeding times	Netherlands
Lely Calm Compact +	Lely	https://www.lely.com/solutions/feeding/calm/	Load cells/RFID	manages and track the feeding program of each animal. Fresh and replacement milk	Netherlands
Lely Calm Vario +	Lely	https://www.lely.com/media/filer_public/fc/bf/fcbf8779-20ee-4eec-aeaa-7c8cf218587b/lely_calm_en.pdf	Load cells/RFID	manages and track the feeding program of each animal. Fresh and replacement milk	Netherlands
Cosmix	Lely	https://www.lely.com/solutions/feeding/cosmix/	Load cells/RFID	Individual feeding according to requirements	Netherlands
Astronaut A4	Lely	https://www.lely.com/solutions/milking/astronaut-a4/	Milking robot (box)	monitor and analyse the milk production performance	Netherlands
MQC-C	Lely	https://www.lely.com/news/2015/03/20/caring-milk-quality-together/	Milk qaulity sensors (conductivity, Spectrometer, Viscosity)	Milk yield and somatic cells countic of each cow, every 3 milkings (automatic frequency adjustment according to SCC curves variations)	Netherlands	yes
Saber Milk	LIC	https://www.licautomation.com/products/milk-monitoring/	Milk quality sensors (Conductivity)	Milk yield, composition and conductivity	New Zealand
Protrack BCS	LIC	https://www.lic.co.nz/products-and-services/automation/protrack-body-condition-scoring/	Camera (3D)	Measures individual BCS as the animals walk through the BCS booth. The body condition score is automatically calculated the for individual animals using the NZ BCS scale (1-10).	New Zealand
Protrack SCC	LIC	https://www.lic.co.nz/products-and-services/automation/protrack-scc/	Milk quality sensors (Viscosity)	Individual somatic cell count in real time durng milking	New Zealand
Activity sensor	Lotek	https://www.lotek.com/products/activity-sensor/	Accelerometer (Collar)	Measures activity for health and heat monitoring	Canada
LiteTrack 330-420 or 140 / PinnaclePro / Ultimate Lite / Ultimate V6C Series / LiteTrack Iridium 130-150 / LifeCycle Pro 330 y 500	Lotek	https://www.lotek.com/products/?segment=terrestrial	GPS (Collar)	GPS positioning	Canada
Luci	Mastiline	https://www.mastiline.com/products/luci/	Milk quality sensors (Biolumenescence Mastitis sensor)	Milk analyzer	Netherlands
Thermistor	Medria Solutions	https://www.medria.fr/en/solutions/velphone/	Bolus	The early detection of febrile responses in very young calves	France
FarmLife® Bouquet	Medria Solutions	https://www.medria.fr/en/solutions/velphone/	accelerometer (Collar) / body-temeprature sesnor	Heat detection, pregnancy validation, calving indicator , early detection of disease	France
Robomax	Milkomax	https://milkomax.com/en/robomax/	Milking robot (box)	monitor and analyse the milk production performance	Canada
Milkrite Neck Tag	Milkrite Interplus	http://www.milkrite-interpuls.co.uk/precision-farming.htm	Accelerometer (leg)	Monitoring activity for heat detection, health and feeding behaviour	Italy
Milkrite Pedometer	Milkrite Interplus	http://www.milkrite-interpuls.co.uk/precision-farming.htm	Accelerometer (leg)	Monitoring activity for heat detection and health	Italy
Smart rumen bolus	Moonsyst	https://moonsyst.com/home	Bolus	Rumen acidosis monitoring	Hungary
Smart Collar	Moonsyst	https://moonsyst.com/collar	Accelerometer (Collar)	Monitoring activity for heat detection and health	Hungary
Moow Rumen bolus	Moow	http://moow.farm/	Bolus	Measures activity, pH, and temperature in rumen	Hungary
Smart Tag	Nedap	https://www.nedap-livestockmanagement.com/wp-content/uploads/2017/07/Nedap-Smarttag-Neck.pdf	Accelerometer (Collar)	Monitoring activity for heat detection and health, rumination and feeding times	Netherlands
Cow Control (SmartTag Neck)	Nedap	https://www.nedap-livestockmanagement.com/dairy-farming/solutions/nedap-cowcontrol/	Accelerometer (Collar)	Monitoring activity for heat detection and health, rumination and feeding times	Netherlands
Cow Control (SmartTag Leg)	Nedap	https://www.nedap-livestockmanagement.com/dairy-farming/solutions/nedap-cowcontrol/	Accelerometer (leg)	Monitoring activity for heat detection and health	Netherlands
Cow feeding station	Nedap	https://www.nedap-livestockmanagement.com/dairy-farming/solutions/electronic-concentrate-feeding/	Load cells/RFID	Measures individual feed intake (concentrate)	Netherlands
Active Herd	NFC group	https://www.tracks360.com/asset-tracking-solutions/gps-rfid-tracking-industries/cattle-bolus/	Bolus	Measures rumen temperature	UK
Pearson SmartTag Neck	Pearson	http://www.pearson-international.com/dairy-systems-milking-machines/heat-detection-with-health-monitoring	Accelerometer (Collar)	Monitoring activity for heat detection, health and feeding behaviour	Ireland
ASTREA 20.20	Pearson	http://www.pearson-international.com/dairy-systems-milking-machines/robotic-milking/astrea-milking-robot	Milking robot (box)	monitor and analyse the milk production performance	Ireland
DAP 3	Prosagri	http://www.prosagri.net/en/prodotti/alimentazione-computerizzata-per-bovini/stazioni-di-alimentazione/	Load cells/RFID	Feeding monitoring - feed concentrates	Italy
Cows milking robot - RDS Futureline MAX - SAC Christensen & CO. - multistalle	SAC	https://sacmilking.com/our-solutions/robotic-dairy-solution/	Milking robot (box)	monitor and analyse the milk production performance	Denmark
FDS3- feeding station	SAC	https://www.agriexpo.online/prod/sac-christensen-co/product-175064-16344.html	Load cells/RFID	Feeding monitoring	Denmark
RDS Futureline MAX	Sensolus	https://www.sensolus.com/	GPS (Collar)	A location tracker on animals	Belgium
SMARTBOW	Smartbow GmbH	https://www.smartbow.com/en/how-it-works.aspx	Accelerometer and indoor location (ear)	Monitoring activity for heat detection and health, rumination and feeding times, lying behaviour	Austria	yes
SmartStock	SmartStock	https://www.smartstock-usa.com/how-smartstock-works-you	Bolus	Measures rumen temperature	USA
smaXtec basic	Smaxtec	https://smaxtec.com/en/	Bolus	Measures activity, rumen pH, and temperature in rumen	Austria
smaXtec premium	Smaxtec	https://smaxtec.com/en/	Bolus	Measures activity and temperature in rumen	Austria
Cattle feed station	System Happel	https://www.system-happel.de/en/index.php?pg=fuetterung.php	Load cells/RFID	Feeding monitoring - feed concentrates	Germany
AktivPuls® Robot	System Happel	https://www.system-happel.de/en/index.php?pg=aktivpuls-robot2020.php	Milking robot (box)	monitor and analyse the milk production performance	Germany
Automated radiolocation animal tracking system	Taggle Systems Pty	https://taggle.com/smart-agriculture/	RFID	Tracking system	Australia
Urban Alma Pro	Urban	http://www.urban-feeder.com/fileadmin/user_upload/mediacenter/alma-pro/en-alma-pro-katalog/index.html#16	Load cells/RFID	Manages and track the feeding program of each animal. Fresh and replacement milk	Germany
VitalHerd	VitalHerd	https://angel.co/company/vitalherd	Bolus	Measures activity, pH, and temperature in rumen	USA
SmartD-TECT Sensor	Wakaito Milking Systems	https://www.waikatomilking.com/products/automation/rotary-automation/ecr-plus/optional-features/smartd-tect/	Milk quality sensors (Conductivity)	Analizes individual quarter conductivity provides early warning of potential udder health issues	New Zealand
Smartis 336	Workshell	https://workswell-thermal-camera.com/thermal-imaging-camera-smartis-industrial/	Camera (thermal)	Thermal imaging to detect inflammation, fever… Udder health or lamenesse	Czech Republic
WirisPro	Workshell	https://workswell-thermal-camera.com/workswell-wiris-pro-sc-thermal-inspection-camera-with-ultrazoom/	Camera (thermal)	Thermal imaging to detect inflammation, fever… Udder health or lamenesse	Czech Republic
Zeddy 500	Zeddy	https://www.zeddy.com/zeddy-500/	Load cells/RFID	Manages and track the feeding program of each animal. Fresh and replacement milk	New Zealand
Zeddy 1250	Zeddy	https://www.zeddy.com/zeddy-1250/	Load cells/RFID	Measures individual feed intake (concentrate)	New Zealand
Number of providers:	67	Nr of technologies:	129	Nr of countries:	21

## Sheet: Appendix table 2
Author	Doi or ISSN	Herd type	Herd/sample size	Location of validation trial	Type of performance measure	Reported measure (legend below)	Validation type (external self-validation or external independent validation )
Borchers et al.	10.3168/jds.2015-10843	Experimental	48	USA	regression	r, CCC	External independent validation
Kaniyamattam and De Vries	10.3168/jds.2013-7690	Experimental	450	USA	regression	r, R2, RMSE	External independent validation
Bicalho et al.,	doi:10.3168/jds.2007-0076	Commercial	620	USA	classification	AUC	External independent validation
Brassel et al,	DOI 10.24425/pjvs.2019.131406	Commercial	109	Ireland	classification	TP, FP, PPV	External independent validation
Mattachini et al	10.1016/j.livsci.2013.10.014	Experimental	20	Israel	regression	R2, I/S	External independent validation
Tamura et al.,	10.1111/asj.13184	Commercial	28	NS	classification	Se, Sp	External self-validation
de Mol et al	0883-8542	Commercial	ns (4 herds betwwn 41 and 117 milking cows)	NS	classification	Se, Sp	External self-validation
Neubauer et al	10.1111/jpn.12675	Experimental	8	Austria	regression	r, CCC, Cb	External independent validation
Werner et al	10.1017/S1751731118003658	Experimental	12	Ireland	regression	rs, CCC, B-A	External self-validation
Lohoelter et al	10.3220/LBF_2013_61-68	Experimental	4	Germany	regression	r,R2, B-A	External independent validation
Werner et al.	10.1016/j.jneumeth.2017.08.022	Experimental	12	Ireland	regression/classification	K,CCC,rs,B-A	External self-validation
van Hertem et al	10.1016/j.biosystemseng.2017.08.011	Commercial	208-242	Belgium	classification	AUC	External self-validation
Mattachini et al	10.2527/jas.2012-5554	Commercial	12	Netherlands	regression	R2, I/S	External independent validation
Sorensen et al	10.3168/jds.2014-8823	Commercial	ns (6 herds, between 103 and 284)	Denmark	classification	Se,FP, SR	External self-validation
Hoffmann et al.	DOI 10.1007/s11259-012-9549-3	Experimental	12	Germany	regression	p, B-A	External independent validation
Schlageter-Tello et al	10.3168/jds.2017-13768	Commercial	208-242	Belgium	classification	K,Se, Sp, PA	External self-validation
Deng et al	10.3389/fvets.2020.00221	Commercial	4829	NS- 6 countries	regression	CCC, B-A	External independent validation
Zehner et al	10.1016/j.compag.2017.02.021	Commercial	60	Switzerland	regression/classification	rs,CCC, Se, Sp, PPV, Ac	External self-validation
Falk et al	10.3168/jds.2015-9725	Experimental	6	Switzerland	regression	p	External independent validation
Reynolds et al	10.3168/jds.2018-15635	Experimental	49	USA	regression	r, CCC, Cb, V,µ	External independent validation
Eslamizadet al	10.1093/jas/sky337	Experimental	10	Germany	regression	R2, I/S	External self-validation
Cantor et al	10.3168/jds.2019-16918	Experimental	20	USA	regression	r,B-A,R2	External independent validation
Burfeind et al	10.3168/jds.2010-3239	Experimental	44	Canada	regression	r, R2	External independent validation
Bikker et al	10.3168/jds.2013-7560	Experimental	15	Netherlands	regression/classification	K, CCC, r, Cb, V, µ	External self-validation
Knauer et al.	10.3168/jds.2015-10770	Experimental	10	USA	regression/classification	CCC, Se, Sp, PPV, NPV, K, Ac	External independent validation
Swartz et al	10.3168/jds.2016-11297	Experimental	5	USA	regression	r, p	External independent validation
Nielsen et al	10.3168/jds.2017-13784	Commercial	30	Sweden	regression	CCC	External self-validation
Grinter et al	10.3168/jds.2018-15563	Experimental	24	USA	regression	r,CCC,R2,B-A, I-S	External independent validation
DeVries et al	10.3168/jds.S0022-0302(03)73962-9	Experimental	12	Canada	regression	R2, Phi	External independent validation
Chapinal et al	10.3168/jds.2007-0331	Experimental	42	Canada	regression/classification	Se, Sp, R2	External independent validation
Chizzotti et al.	10.3168/jds.2014-8925	Experimental	12	Brazil	regression/classification	Se, Sp, I/S	External self-validation
Schirmann et al.	10.3168/jds.2009-2361	Experimental	47	Canada	regression	r,R2, B-A	External independent validation
Pereira et al.	10.3168/jds.2016-12534	Experimental	24	USA	regression	r, CCC. Cb, V,µ	External independent validation
Zambelis et al.	10.3168/jds.2018-15766	Commercial	10	Canada	regression	r	External independent validation
Elisher et al.	10.3168/jds.2013-6790	Experimental	15	USA	regression	r, B-A,	External independent validation
Mullins et al	10.3390/ani9060287	Commercial	521	USA	regression	r, B-A	External independent validation
Kröeger et al.,	10.1016/j.livsci.2016.10.007	Experimental	8	Austria	regression	r, CCC, Cb, V,µ, R2	External independent validation
Ruuska et al.	10.1016/j.applanim.2015.11.005	Experimental	6 and 18	Finland	regression	R2, I/S, p	External self-validation
Oliveira Jr eta al.	10.1017/S1751731117002002	Commercial	35	Brazil	regression/classification	Se, Sp, MSPE, r, R2, I/S, %bias	External self-validation
Henriksen and Munksgaard	10.1017/S1751731118001623	Experimental	40	Denmark	regression	r, I/S	External independent validation
Shepley et al	10.3390/agriculture7070053	Experimental	20	Canada	regression	r	External independent validation
Steinmetz et al	10.1080/1745039X.2020.1721260	Experimental	15	Germany	regression/classification	R2, rs, Se, Sp, Ac, MCC, Pre	External independent validation
Legend for reported measure:
r	Pearson correlation
CCC	Concordance correlation
R2	Coefficient of determination
RMSE	Root-mean-square error
rs	Spearman's correlation
ROC	Receiver operating characteristic curve
K	Cohen's kappa coefficient
TP	True positive
FP	False positive
%bias	Mean bias error
MCC	Matthews Correlation Coefficient
I/S	Significance of the slope and intercept differed from 1 and 0
Se	Sensitivity
Sp	Specificity
Cb	Bias correction factor
B-A	Bland–Altman Plot
SR	Success rate
p	P-values
PA	Percentage of agreement
PPV	Positive Predictive Value
Ac	Accuracy
Pre	Precision
V	Location shift
µ	Scale shift
Phi	Phi correlation coefficient
